# Supplementary material for: Highly Efficient Energy Transfer from Silicon to Erbium in Erbium-Hyperdoped Silicon Quantum Dots
Source: MDPI journal article supplement (doi:10.3390/nano13020277), 2023-01-09
Supplement: s1 [file s1]

# Highly Efficient Energy Transfer from Silicon to Erbium in Erbium-Hyperdoped Silicon Quantum Dots

Kun Wang <sup>1</sup>, Qiang He <sup>1</sup>, Deren Yang <sup>1,2</sup> and Xiaodong Pi <sup>1,2,\*</sup>

<sup>1</sup> State Key Laboratory of Silicon and Advanced Semiconductor Materials & School of Materials Science and Engineering, Zhejiang University, Hangzhou 310027, China

<sup>2</sup> Institute of Advanced Semiconductors & Zhejiang Provincial Key Laboratory of Power Semiconductor Materials and Devices, Hangzhou Innovation Center, Zhejiang University, Hangzhou 311215, China

\* Correspondence: xdpi@zju.edu.cn

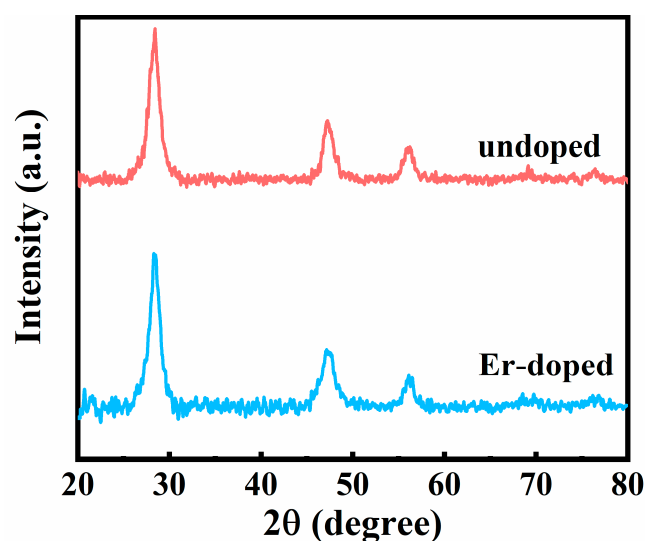

Figure S1. XRD patterns of Si QDs with pristine and Er hyperdoping.

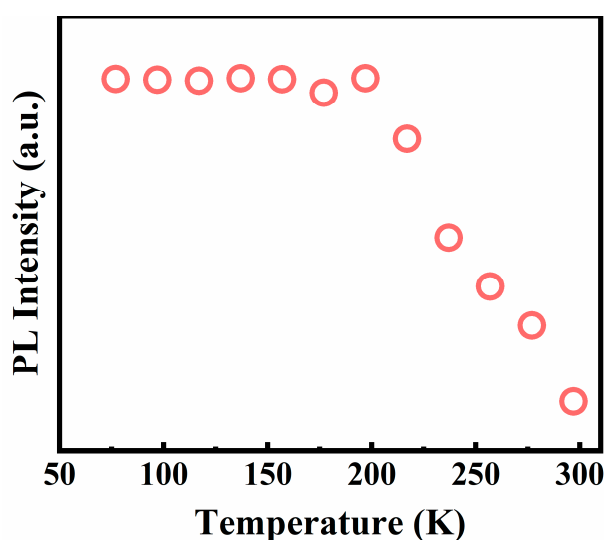

Figure S2. Temperature-dependent integrated emission intensity of undoped Si QDs.

**Table S1.** Atomic fraction of various charge states of Si

| Sample               | N <sub>Si<sup>0+</sup></sub> | N <sub>Si<sup>1+</sup></sub> | N <sub>Si<sup>2+</sup></sub> | N <sub>Si<sup>3+</sup></sub> | N <sub>Si<sup>4+</sup></sub> | SiO <sub>x</sub>   | d (nm) |
|----------------------|------------------------------|------------------------------|------------------------------|------------------------------|------------------------------|--------------------|--------|
| Undoped Si QDs       | 30.29                        | 42.93                        | 7.11                         | 0                            | 19.56                        | SiO <sub>1.0</sub> | 0.8    |
| Er-hyperdoped Si QDs | 41.98                        | 43.21                        | 7.38                         | 7.43                         | 0                            | SiO <sub>0.7</sub> | 0.6    |

**Note S1. The fitting of PL decay curves and the determination of PL lifetime**

Both of the PL decay curves can be well-fitted by a biexponential equation

$$I(t) = A_1 e^{-\frac{t}{\tau_1}} + A_2 e^{-\frac{t}{\tau_2}}, \quad (S1)$$

where  $I(t)$  is the PL intensity at time  $t$ ,  $A_1$  and  $A_2$  are fitting constants, and  $\tau_1$  and  $\tau_2$  are the fast and slow decay time, respectively. The effective average lifetime  $\tau$  can be estimated by the following equation [9]

$$\tau = \frac{A_1 \tau_1^2 + A_2 \tau_2^2}{A_1 \tau_1 + A_2 \tau_2}, \quad (S2)$$

**References**

- Wang, K.; He, Q.; Yang, D.; Pi, X. Erbium-Hyperdoped Silicon Quantum Dots: A Platform of Ratiometric Near-Infrared Fluorescence. *Adv. Opt. Mater.* **2022**, *10*, 2201831, doi:10.1002/adom.202201831.
